# Nanotube-mediated cross-feeding couples the metabolism of interacting bacterial cells

Shraddha Shitut<sup>1,2</sup>, Tobias Ahsendorf<sup>3,4</sup>, Samay Pande<sup>1†</sup>, Matthew Egbert<sup>5</sup>, Christian Kost<sup>1,2\*</sup>

<sup>1</sup> Experimental Ecology and Evolution Research Group, Department of Bioorganic Chemistry, Max Planck Institute for Chemical Ecology, Jena, 07745, Germany

<sup>2</sup> Department of Ecology, School of Biology/Chemistry, University of Osnabrück, Osnabrück, 49076, Germany

<sup>3</sup> Deutsches Krebsforschungszentrum, Heidelberg, Baden-Württemberg, D-69120, Germany

<sup>4</sup> Department of Systems Biology, Harvard Medical School, Boston, MA 02115, USA

<sup>5</sup> Department of Computer Science, University of Auckland, Auckland, 1010, New Zealand

\* Correspondence to: Christian Kost

School of Biology/ Chemistry  
University of Osnabrück  
Barbarastrasse 13  
49076 Osnabrück, Germany  
Tel.: [++49 \(0\)541 969 2853](tel:++49(0)5419692853)  
[christiankost@gmail.com](mailto:christiankost@gmail.com)

†Current address- Department of evolutionary biology, Swiss Federal Institute of Technology (ETH), Zurich, Switzerland

**Originality-Significance Statement:** The results of our study indicate that the distribution of metabolites within networks of interacting bacterial cells may be self-organized by local interactions among neighbouring cells rather than requiring a super-ordinated regulatory system.

**Running title:** Metabolic coupling in bacteria

**Keywords:** Microbial interactions, metabolism, bacterial physiology, metabolite cross-feeding, nanotubes, inter-cellular coordination.

41 **ABSTRACT**

42 Bacteria frequently engage in cross-feeding interactions that involve an exchange of  
43 metabolites with other micro- or macroorganisms. The often obligate nature of these  
44 associations, however, hampers manipulative experiments, thus limiting our mechanistic  
45 understanding of the ecophysiological consequences that result for the organisms  
46 involved. Here we address this issue by taking advantage of a well-characterised  
47 experimental model system, in which auxotrophic genotypes of *E. coli* derive essential  
48 amino acid from prototrophic donor cells using intercellular nanotubes. Surprisingly,  
49 donor-recipient cocultures revealed that the mere presence of auxotrophic genotypes in  
50 coculture was sufficient to increase amino acid production levels in donor cells.  
51 Subsequent experiments unravelled that this effect was due to the depletion of amino  
52 acid concentrations in the cytoplasm of donor cells, which delayed feedback inhibition of  
53 the corresponding amino acid biosynthetic pathway. This finding indicates that in newly  
54 established mutualistic associations, an intercellular regulation of exchanged  
55 metabolites can simply emerge from the architecture of the underlying biosynthetic  
56 pathways, rather than through the evolution of new regulatory mechanisms. Taken  
57 together, our results show that a single loss-of-function mutation can physiologically  
58 couple the metabolism of two cross-feeding cells in a source-sink-like relationship.

59

60

61

62

63

## 64 **INTRODUCTION**

65 Bacteria often engage in metabolic cross-feeding interactions with other bacteria and  
66 eukaryotic organisms (Kiers, Rousseau et al. 2003, Belenguer, Duncan et al. 2006,  
67 Vogel and Moran 2011, Johnson, Goldschmidt et al. 2012, McFall-Ngai 2014, Seth and  
68 Taga 2014, Ponomarova and Patil 2015, Zelezniak, Andrejev et al. 2015, Estrela, Kerr et  
69 al. 2016). In many of these cases, two or more interacting partners reciprocally  
70 exchange primary building block metabolites such as amino acids (Payne, Rouatt et al.  
71 1957, Junglas, Briegel et al. 2008, Sieuwerts, Molenaar et al. 2010, Vogel and Moran  
72 2011, Garcia, Buck et al. 2015), vitamins (Croft, Lawrence et al. 2005, Rodionova, Li et  
73 al. 2015), or even nucleotides (Sieuwerts, Molenaar et al. 2010, Dean, Hirt et al. 2016,  
74 Loera-Muro, Jacques et al. 2016). However, why do organisms produce these  
75 compounds to benefit others, rather than using these metabolites for themselves?  
76 Recent empirical and theoretical evidence suggests that adaptive benefits resulting from  
77 the loss of biosynthetic functions may drive the establishment of such metabolic  
78 interactions: Organisms may release metabolites into the extracellular environment, for  
79 example as a consequence of a leaky membrane (Shiio, Ocirc et al. 1962) or overflow  
80 metabolism (Paczia, Nilgen et al. 2012). Any mutant that has lost the ability to produce  
81 the corresponding compounds will start to use these environmentally available  
82 metabolite pools (D'Souza, Waschina et al. 2014, D'Souza and Kost 2016). Since  
83 auxotrophic mutants save the costs of producing the focal metabolites by themselves,  
84 they gain a selective advantage over other, prototrophic cells that still produce them  
85 (Morris, Lenski et al. 2012, D'Souza, Waschina et al. 2014). Moreover, in some species,  
86 auxotrophy-causing mutations even trigger the formation of intercellular nanotubes  
87 (Pande, Shitut et al. 2015). These are membrane-based structures that help auxotrophic

88 bacteria to derive amino acids from the cytoplasm of other bacteria, thus enhancing  
89 metabolite transfer between cells.

90 The idea that adaptive gene loss causes the establishment of obligate cross-feeding  
91 interactions has been termed the *black queen hypothesis* (Morris, Lenski et al. 2012,  
92 Morris 2015). Indeed, finding that metabolic auxotrophies are crucially involved in many  
93 naturally-occurring cross-feeding interactions corroborates this interpretation (Croft,  
94 Lawrence et al. 2005, Giovannoni, Tripp et al. 2005, Sahu and Ray 2008, Garcia, Buck  
95 et al. 2015, Hubalek, Buck et al. 2017). Since gene loss seems to be a key step in the  
96 establishment of metabolic cross-feeding interactions, most naturally evolved systems  
97 are characterized by obligate dependencies among the interacting parties. This means  
98 that the participating genotypes can usually not be cultivated in isolation, thus impeding  
99 experimental manipulation (Pande and Kost 2017). As a consequence, mechanistic  
100 details on how the transition into a metabolic mutualism affects the physiology of the  
101 strains involved remain poorly understood. For example, it is not clear whether or not a  
102 unidirectional exchange of amino acids via nanotubes incurs fitness costs to donor  
103 cells? Moreover, it is unknown how the consumption of amino acids by a recipient  
104 affects amino acid production of a donor cell?

105 Here we address these questions taking advantage of a previously established  
106 model system, in which two genotypes of *E. coli* unidirectionally exchange essential  
107 amino acids. These one-way cross-feeding interactions were established by matching  
108 amino acid donors with auxotrophic recipients that obligately required the corresponding  
109 amino acid for growth. Utilizing genetically engineered single gene deletion mutants for  
110 this purpose ruled out pre-existing traits that arose as a consequence of a  
111 coevolutionary history among interaction partners. Moreover, a focus on unidirectional

112 cross-feeding excluded confounding effects that may occur in reciprocal interactions  
113 such as for example self-enhancing feedback loops (Kun, Papp et al. 2008). Finally,  
114 taking advantage of intracellular reporter constructs allowed analysing both internal  
115 amino acid pools as well as their production levels in real-time under *in vivo* conditions.

116 Our experimental results revealed not only that auxotrophic recipients used  
117 nanotubes to derive amino acids from prototrophic cells, but also that this process  
118 increased the production of the focal amino acid in donor cells. This was due to a drop in  
119 amino acid-concentrations in the cytoplasm of donor cells, which delayed the feed-back  
120 inhibition of the corresponding biosynthetic pathway and in this way increased  
121 production levels of the focal amino acid. In other words, a nanotube-mediated  
122 exchange of cytoplasmic amino acids coupled the metabolism of two interacting partners  
123 in a source-sink-like relationship. These results show for the first time that regulatory  
124 mechanisms that control the production of amino acids in one cell, can easily be  
125 extended to include other cells as well, provided the interaction is based on an  
126 intercellular exchange of metabolites via nanotubes.

127

## 128 **RESULTS**

### 129 **Construction and characterisation of unidirectional cross-feeding interactions**

130 To establish unidirectional cross-feeding interactions within *Escherichia coli*, five  
131 different genotypes served as amino acid donors: Two single gene deletion mutants  
132 ( $\Delta mdh$  and  $\Delta nuoM$ ) that produce increased amounts of several different amino acids  
133 (Pande, Merker et al. 2014), two deletion mutants that produce increased amounts of  
134 either histidine or tryptophan ( $\Delta hisL$  and  $\Delta trpR$ ) (Pande, Kaftan et al. 2015), as well as  
135 unmanipulated *E. coli* WT cells (Figure 1, Supplementary Table 1). Three genotypes

136 served as recipients, which were auxotrophic for the amino acids histidine ( $\Delta hisD$ ),  
137 lysine ( $\Delta lysR$ ), and tryptophan ( $\Delta trpB$ ) (Figure 1, Supplementary Table 1) and thus  
138 essentially required an external source of these metabolites to grow (Bertels, Merker et  
139 al. 2012).

140 As a first step, we quantified the amounts of amino acids the five donor strains  
141 produced in monoculture during 24 hours of growth. Analysing culture supernatant and  
142 cytoplasm of the focal donor populations using LC/MS/MS revealed that  $\Delta nuoN$   
143 produced significantly increased amounts of histidine, lysine, and tryptophan in both  
144 fractions relative to the WT (Mann Whitney U-test:  $P < 0.05$ ,  $n=4$ , Supplementary Figure  
145 1), while production levels of the  $\Delta mdh$  mutant did not differ significantly from WT-levels  
146 (Mann Whitney U-test:  $P > 0.05$ ,  $n=4$ , Supplementary Figure 1). Similarly, both the intra-  
147 and extracellular concentrations of tryptophan in the  $\Delta trpR$  mutant were significantly  
148 elevated over WT-levels (Mann Whitney U-test:  $P < 0.05$ ,  $n=4$ , Supplementary Figure 1).  
149 In contrast,  $\Delta hisL$  released twice as much of histidine into the growth medium as was  
150 released by the WT (two sample Mann Whitney test:  $P < 0.05$ ,  $n=4$ , Supplementary  
151 Figure 1), while it contained much lower levels of histidine in its cytoplasm than the WT.

152

### 153 **Intercellular transfer of amino acids is contact-dependent**

154 Taking advantage of a set of well-characterised genotypes, we addressed the question  
155 whether donor and recipient cells exchange amino acids in coculture, and if so, whether  
156 this interaction is contact-dependent. To this end, populations of donor and recipient  
157 cells were cocultured in a device (i.e. *Nurmikko cell*), in which both partners can either  
158 be grown together in the same compartment or be separated by a filter membrane that  
159 allows passage of small molecules, yet prevents direct physical interactions between

160 bacterial cells (Pande, Shitut et al. 2015). Inoculating donor and recipient strains in  
161 different combinations revealed, in all tested cases, growth of auxotrophic recipients  
162 when they were not physically separated from donors (Figure 2A-C). Auxotrophic  
163 recipients grew significantly better when cocultured with amino acid overproducers  
164 ( $\Delta mdh$ ,  $\Delta nuoN$ ,  $\Delta hisL$ , and  $\Delta trpR$ ) than with the WT (Dunnett's T3 post hoc test:  $P < 0.05$ ,  
165  $n=4$ ). However, introducing a filter membrane to physically separate donor and recipient  
166 cells effectively eliminated growth of recipients in all cases. Surprisingly, the process of  
167 coculturing in this way did not affect the growth of donor populations (Figure 2A-C). This  
168 observation suggested that even though donor cells had to produce all the amino acids  
169 required by auxotrophs for growth (i.e. His, Lys, and Trp), these increased production  
170 level did not significantly affect the final growth of donor genotypes. To further evaluate  
171 whether the observed increased amino acid production levels did not incur a fitness cost  
172 to donor cells, the growth rates of donor populations in mono- and coculture during the  
173 exponential phase were compared. This experiment revealed a cost of amino acid  
174 production that only affected overproducing genotypes (i.e.  $\Delta mdh$ ,  $\Delta nuoN$ , and  $\Delta trpR$ )  
175 when paired up with the tryptophan-auxotrophic recipient  $\Delta trpB$  (Figure 2D). In these  
176 cases, the growth rate of donor genotypes in coculture was significantly reduced relative  
177 to their growth in monocultures (FDR-corrected paired sample t-tests:  $P < 0.05$ ,  $n=6$ ). In  
178 all other cases, with WT as donor and lysine- or histidine auxotrophic recipients, no  
179 fitness cost was detected (FDR-corrected paired sample t-tests:  $P > 0.05$ ,  $n=6$ ). Three  
180 main insights result from this experiment: First, even though producing the amino acids  
181 auxotrophs required for growth significantly reduced the growth rate of donors in some  
182 cases, this fitness cost was not detectable on the level of the population size after 24 h  
183 of growth in coculture. Second, the total productivity of donors and recipients was

184 significantly increased when cells were cocultured as compared to the situation when  
185 they were physically separated by a filter membrane (Mann Whitney U-test:  $P < 0.05$ ,  
186  $n=4$ , Figure 2A-C). Third, physical contact between donor and recipient cells was  
187 required for a transfer of amino acids between cells.

188

### 189 **Cytoplasmic constituents are transferred from donor to recipient cells via** 190 **nanotubes**

191 The observation that metabolite cross-feeding among cells was contact-dependent  
192 suggested that separating cells with a physical barrier prevented the establishment of  
193 structures required for amino acid exchange. A possible explanation for this could be  
194 intercellular nanotubes, which would allow direct transfer of cytoplasmic amino acids  
195 from donor to recipient cells (Pande, Shitut et al. 2015). Indeed, microscopic analysis  
196 revealed the presence of nanotubes connecting cells in a coculture of donor and  
197 recipient in media not supplemented with amino acid (Figure 3A). These structures were  
198 absent in cocultures when the focal amino acid was externally supplied. Nanotubes were  
199 also absent in monocultures of donor and recipient strains indicating a role in amino acid  
200 exchange. This hypothesis was further verified by differentially labelling the cytoplasm of  
201 donor and recipient cells with plasmids that express either red or green fluorescent  
202 proteins. Quantifying the proportion of recipient cells that contained both cytoplasmic  
203 markers after 24 hours of growth in coculture using flow cytometry allowed us to  
204 determine the exchange of cytoplasmic materials between cells under our experimental  
205 conditions. Finding that all cocultures analysed comprised a significant proportion of  
206 auxotrophic cells containing both fluorescent proteins simultaneously confirmed that  
207 cytoplasmic materials such as protein and free amino acids have been transferred from



208 donor to recipient cells (Figure 3B). However, it has been previously shown that the  
209 presence of the amino acid auxotrophic genotypes require for growth, prevents the  
210 formation of nanotubes (Pande, Shitut et al. 2015). Uncoupling the obligate dependency  
211 by supplementing the growth medium with saturating concentrations of the focal amino  
212 acid provided no evidence for a significant increase in double-labelled auxotrophs  
213 (Figure 3B), thus linking the establishment of these structures to the physiological  
214 requirement for amino acid cross-feeding.

215

### 216 **Auxotrophic recipients derive amino acid from cocultured donor cells**

217 One hypothesis that could explain why recipients were able to grow in donor-recipient  
218 cocultures but not when cells were separated by a membrane filter (Figure 2A-C) is that  
219 the physical contact between cells increased amino acid production rates of donors.  
220 Amino acid production is energetically and metabolically very costly to the bacterial cell  
221 (Craig and Weber 1998, Akashi and Gojobori 2002, Kaleta, Schäuble et al. 2013). To  
222 minimize production costs, bacteria tightly regulate their amino acid biosynthesis, for  
223 example by end product-mediated feedback mechanisms that reduce production rates  
224 when cytoplasmic amino acid concentrations exceed critical thresholds (Thieffry, Huerta  
225 et al. 1998, Carlson 2007). In our case, recipient cells removed amino acids from the  
226 cytoplasm of donors using nanotubes. This decrease in the cell-internal amino acid  
227 pools could delay feedback inhibition in the donor cell, thus increasing its overall amino  
228 acid production (Figure 4). Quantifying the amount of free amino acids in the cytoplasm  
229 of donor cells in both the absence and presence of an auxotrophic recipient would allow  
230 testing the delayed-feedback inhibition hypothesis.

231 To determine cytoplasmic concentrations of free amino acids in real-time, we  
232 used the lysine riboswitch as a cell-internal biosensor. When free lysine binds to the  
233 riboswitch, it undergoes a conformational change, thus down-regulating expression of a  
234 downstream reporter gene, in our case *gfp* (Caron, Bastet et al. 2012). Introducing the  
235 plasmid-borne reporter construct (hereafter: *Lys-riboswitch*, Supplementary Figure 2)  
236 into the lysine auxotroph  $\Delta$ *lysR* and exposing the resulting cells to different  
237 concentrations of lysine validated the utility of this biosensor: A strong negative  
238 correlation between the cells' cytoplasmic amino acid concentrations as quantified via  
239 LC/MS/MS analysis of lysed cells and their fluorescence emission ( $r=-0.68$ ,  $P=0.003$ ,  
240 Supplementary Figure 3) corroborated that this construct allowed indeed determining  
241 levels of free lysine in the cytoplasm of living *E. coli* cells by simply quantifying their GFP  
242 emission.

243 Accordingly, introducing the lys-riboswitch into the lysine auxotrophic recipient  
244 ( $\Delta$ *lysR*) and growing the resulting strain in lysine-supplemented media revealed  
245 consistently elevated levels of cytoplasmic lysine throughout the experiment (Figure 5B).  
246 In contrast, when the same recipient cells were grown in the absence of lysine, cell-  
247 internal lysine levels were significantly reduced (FDR-corrected paired sample t-tests:  
248  $P<0.005$ ,  $n=4$ , Figure 5B), indicating amino acid starvation of auxotrophic cells.  
249 Interestingly, when recipient cells were grown in the presence of one of the three donor  
250 genotypes, their lysine levels resembled that of lysine-starved auxotrophs until 18 hours  
251 of cocultivation, after which lysine levels increased back to the level of lysine-  
252 supplemented cells (FDR-corrected paired sample t-tests:  $P<0.04$ ,  $n=4$ , Figure 5B). Prior  
253 to these coculture experiments, auxotrophs had to be pre-cultured in lysine-containing  
254 medium. Thus, the lysine levels measured in auxotrophs under coculture conditions

255 likely reflected the fact that these cells first used up internal residual lysine pools before  
256 switching to other sources, in this case the cytoplasmic lysine of donor cells. Consistent  
257 with this interpretation is the observation that the presence of donor cells that provided  
258 this amino acid allowed lysine auxotrophs to grow (Figure 5A). A strongly positive  
259 correlation between the growth of lysine auxotrophs and their cell-internal lysine levels  
260 corroborates that the lysine auxotrophic recipients obtained from cocultured donor cells  
261 indeed limited their growth ( $r=0.625$ ,  $P=0.003$ , Supplementary Figure 4).

262  
263 **The presence of auxotrophic recipients increases cytoplasmic amino acid**  
264 **concentrations in donor cells**

265 To test the delayed-feedback inhibition hypothesis, the lys-riboswitch was introduced  
266 into the three donors WT,  $\Delta mdh$ , and  $\Delta nuoN$ . Each of these donor genotypes were then  
267 grown in monoculture as well as in coculture with the lysine-auxotrophic strain  $\Delta lysR$ . In  
268 these donor-recipient pairs only the donor contained the reporter plasmid.

269 The amino acid biosynthesis of WT cells is most stringently controlled, thus  
270 preventing accumulation of free lysine in its cytoplasm. In contrast, the cytoplasm of the  
271  $\Delta nuoN$  strain was characterized by generally increased amino acid levels  
272 (Supplementary Figure 1). Similarly, deletion of the malate dehydrogenase gene caused  
273 an accumulation of citric acid cycle intermediates and thus a dysregulated amino acid  
274 biosynthesis in the  $\Delta mdh$  mutant (Pande, Merker et al. 2014). Hence, removing lysine  
275 from the cytoplasm by auxotrophs is expected to trigger the strongest response in WT  
276 cells in terms of how much cytoplasmic lysine levels are increased. In contrast, higher  
277 concentrations of lysine or its biochemical precursors in the cytoplasm of the  $\Delta mdh$ - and

278 the  $\Delta nuoN$  strain may prevent a lowering of the lysine concentration below the critical  
279 threshold that triggers a further production.

280 We tested these predictions by monitoring changes in intracellular lysine levels of  
281 donor cells using the lys-riboswitch. In monocultures, lysine levels increased steadily  
282 over time (Figure 5C). This pattern, however, changed in the presence of the  
283 auxotrophic recipient. When *E. coli* WT cells were used as donor, their cytoplasmic  
284 lysine levels first increased significantly over the levels WT cells reached in monoculture  
285 (FDR-corrected paired sample t-tests:  $P < 0.03$ ,  $n = 4$ , Figure 5C). After that lysine levels  
286 dropped significantly before increasing back to monoculture levels (Figure 5C). The  
287 observed fluctuations in the lysine levels of the donor's cytoplasm are consistent with a  
288 nanotube-mediated cell attachment that is contingent on the nutritional status of the  
289 receiving cell. In contrast, when  $\Delta mdh$  and  $\Delta nuoN$  were cocultured as donor strains  
290 together with the auxotrophic recipient, their cytoplasmic lysine levels did not fluctuate  
291 as seen before in cocultures with WT (Figure 5C). While the cytoplasmic lysine levels of  
292  $\Delta mdh$  did not differ between mono- and coculture conditions, the  $\Delta nuoN$  strain showed  
293 significantly increased lysine levels in its cytoplasm towards the end of the coculture  
294 experiment relative to  $\Delta nuoN$  monocultures (FDR-corrected paired sample t-tests:  
295  $P < 0.03$ ,  $n = 4$ , Figure 5C). Thus, these observations are in line with the above  
296 expectations and confirm that an auxotroph-mediated removal of amino acids from the  
297 donor's cytoplasm was sufficient to prompt an increased amino acid biosynthesis levels  
298 in donor cells. Conversely, lysine-auxotrophic recipients displayed significantly increased  
299 lysine levels when cocultured with one of the donor genotypes relative to lysine-starved  
300 monocultures (Figure 5B). Both observations together suggest a unidirectional transfer  
301 of amino acids from donor to recipient cells that resulted in an up-regulated amino acid

302 biosynthesis in donors that depended on the presence of auxotrophic genotypes.  
303 Hence, these findings concur with the delayed-feedback inhibition hypothesis (Figure 4).

304  
305 **The presence of auxotrophic recipients increases transcription of biosynthesis**  
306 **genes in donor cells**

307 Bacterial cells use feedback inhibition to maintain homeostasis of certain metabolites in  
308 their cytoplasm. Once metabolite levels drop below a certain threshold, production levels  
309 are increased to allow optimal growth (Umbarger 1978, Scott, Gunderson et al. 2010). In  
310 the case of amino acid biosynthesis, the promoter elements that control transcription of  
311 biosynthetic pathways are frequently highly sensitive to intracellular levels of the  
312 synthesized amino acid (Thieffry, Huerta et al. 1998), thus enhancing transcription of the  
313 operon when the focal amino acid is scarce. As soon as amino acid concentrations  
314 reach optimal levels, further transcription is blocked enzymatically (Blasi, Bruni et al.  
315 1973) or by direct binding of the amino acid to the operon (Yanofsky, Platt et al. 1981).

316 Taking advantage of this principle, we employed plasmid-borne promoter-GFP-fusion  
317 constructs to identify transcriptional changes in amino acid biosynthesis genes  
318 (Supplementary Figure 2). These reporter constructs have been previously shown to  
319 accurately measure promoter activity with a high temporal resolution (Zaslaver, Bren et  
320 al. 2006). For analysing the focal cross-feeding interactions, fusion constructs for *hisL*  
321 and *trpL* were selected, which respond to changes in the cytoplasmic concentration of  
322 histidine (Ames, Tsang et al. 1983) and tryptophan (Yanofsky, Platt et al. 1981, Merino,  
323 Jensen et al. 2008), respectively. Correlating GFP emission levels with the cytoplasmic  
324 concentration of the corresponding amino acid as quantified chemically via LC/MS/MS,  
325 revealed a significantly negative relationship for both histidine ( $r=-0.407$ ,  $P<0.001$ ,

326 Supplementary Figure 3B) and tryptophan ( $r=-0.237$ ,  $P=0.038$ , Supplementary Figure  
327 3C), confirming the link between transcription of metabolic genes and the cytoplasmic  
328 concentration of the corresponding amino acids.

329 These promoter-GFP-fusion constructs were introduced into donor cells (i.e. WT,  
330  $\Delta mdh$ ,  $\Delta hisL$ , and  $\Delta trpR$ ), which were then cultivated for 24 hours in the absence or  
331 presence of the auxotrophic recipients  $\Delta hisD$  or  $\Delta trpB$ . In line with expectations, the  
332 presence of auxotrophic recipients strongly increased transcription of the corresponding  
333 biosynthetic genes in both WT and  $\Delta trpR$  donor cells as compared to monocultures of  
334 donors (FDR-corrected paired t-tests:  $P<0.05$ ,  $n=4$ , Figure 6). Interestingly, the histidine  
335 overproducing donor  $\Delta hisL$ , which was characterized by cytoplasmic histidine levels that  
336 were significantly lower than the one observed in WT cells (Supplementary Figure 1B),  
337 had a four-fold higher promoter activity when paired with the auxotrophic recipient. Only  
338 the biosynthetic activity of the  $\Delta mdh$  overproducer was unresponsive to the presence of  
339 histidine- and tryptophan-auxotrophic recipient.

340 Together, these results demonstrate that the presence of auxotrophic recipients  
341 significantly increased the amino acid production of donor cells. By withdrawing amino  
342 acids from the cytoplasm of donor cells, auxotrophic recipients prompted donor cells to  
343 readjust their amino acid levels by up-regulating the transcription of the corresponding  
344 amino acid biosynthesis genes.

345

## 346 **DISCUSSION**

347 Our study demonstrates for the first time that the deletion of a single metabolic gene  
348 from a bacterial genome can be sufficient to physiologically couple the metabolism of  
349 two independent bacterial cells. Auxotrophic cells that had lost the ability to

350 autonomously produce a certain amino acid established intercellular nanotubes to derive  
351 the amino acid they required for growth from other cells in the environment. Quantifying  
352 cell-internal amino acid levels as well as transcriptional activities of donor cells revealed  
353 an intercellular regulation of amino acid biosynthesis between donor and recipient in a  
354 source-sink-like manner. This relationship emerged as a consequence of feedback-  
355 based control mechanisms in the biosynthetic pathways of individual cells. These results  
356 show that a single loss-of-function mutation is not only sufficient to establish a metabolic  
357 interaction between two cells, but also that this can result in an intercellular regulation of  
358 amino acid biosynthesis that may help to reduce the costs arising from increased  
359 production levels.

360 The metabolic network of a cell provides and maintains specific levels of the building  
361 block metabolites that are required for growth (Holms 1996). An excess or deficit of  
362 metabolites within cells can disturb the cell-internal equilibrium and thus cause stress  
363 (Lee, Trostel et al. 2009, Grüning, Lehrach et al. 2010). For example, suboptimal  
364 metabolite concentrations in a cell's cytoplasm can lead to osmotic imbalance (Csonka  
365 1989) or cause oxidative stress (Chechik, Oh et al. 2008). To avoid these detrimental  
366 effects, bacteria have evolved complex mechanisms to sense and tightly control  
367 cytoplasmic metabolite levels. In the case of amino acids, this involves transcription  
368 attenuation, transcriptional repression, and feed-back enzyme inhibition (Umbarger  
369 1978, Chopin 1993, Yanofsky 2004). If entering into a metabolic interaction with another  
370 organism negatively affected cellular homeostasis, this fact would represent a significant  
371 hurdle for the establishment of such interactions. However, finding that the same  
372 mechanisms that control metabolite production within cells also operate when some of  
373 the produced metabolites are transferred to other cells implies that consortia consisting

374 of multiple cells may also optimally control metabolite production levels according to the  
375 needs of the cells involved.

376         When two complementary amino auxotrophic genotypes interact, the cross-  
377 feeding consortium can gain a fitness advantage of up to 20% relative to prototrophic  
378 cells, when both parties produce sufficient amounts of the metabolite their respective  
379 partner requires for growth (Pande, Merker et al. 2014). The results of our study can  
380 help to explain this fitness advantage: by selectively upregulating biosynthetic pathways  
381 that enhance growth of the consortium, cells only invest resources into those  
382 metabolites that help their current interaction partner to grow. In our experiments, the  
383 cost of producing increased amounts of amino acids to support the growth of another  
384 cell was only detectable for tryptophan on the level of the growth rate achieved (Fig. 2D).  
385 This observation is in line with previously published data, which indicates that of all three  
386 amino acids analysed in this study, tryptophan is the one that incurs the highest  
387 metabolic cost (Akashi and Gojobori 2002, Kaleta, Schäuble et al. 2013). Nevertheless,  
388 the cell densities all tested donor genotypes reached after growing for 24 h were  
389 independent of whether or not auxotrophic genotypes were present in the same  
390 environment (Fig. 2A-C), suggesting growing donor cells compensated for these costs.  
391 This can also explain the abovementioned strong fitness advantage experienced by cells  
392 engaging in reciprocal interactions: if each of two interacting cells slightly increase the  
393 production levels of the metabolite their respective partner requires for growth, both cells  
394 save the costs to produce another metabolite at all. In total, more resources are saved  
395 than invested, thus resulting in a net advantage of cross-feeding relative to metabolic  
396 autonomy.



397 Nutritional stress and starvation of bacterial cells, as is for example induced by  
398 auxotrophy-causing mutations, is known to trigger an aggregative lifestyle (Beloin, Valle  
399 et al. 2004, Benomar, Ranava et al. 2015). In many cases, this physical contact is  
400 followed by an exchange of cytoplasmic contents between interacting cells (Jahn,  
401 Gallenberger et al. 2008, Benomar, Ranava et al. 2015, Pande, Shitut et al. 2015).  
402 Structurally related intercellular connections are known to be involved in short- and long-  
403 distance communication in many multicellular organisms (Wegener 2001, Belting and  
404 Wittrup 2008). In both cases, networks of interacting cells are challenged with the  
405 question how to optimally distribute molecules within the interaction network. While the  
406 intercellular communication within tissues of eukaryotic organisms is notoriously difficult  
407 to study, our system provides a paradigmatic case to experimentally study the  
408 constraints and rules that determine the assembly and structure of intercellular  
409 communication networks. In this context, the results of our study indicate that the  
410 distribution of metabolites within networks of interacting bacterial cells may be self-  
411 organized by local interactions among neighbouring cells rather than requiring a  
412 superordinated regulatory system.

413 A functionally fused metabolism of two previously independent organisms as  
414 observed in this study, is strikingly reminiscent of the metabolic relationships that are  
415 frequently observed in symbiotic or pathogenic bacteria that infect eukaryotic hosts. For  
416 example, in the obligate association between aphids (*Acyrtosiphon pisum*) and their  
417 endosymbiotic bacteria *Buchnera aphidicola*, the aphid host regulates the amino acid  
418 production levels of its symbionts by changing its intracellular precursor concentrations  
419 (Russell, Poliakov et al. 2014). This functional link is afforded by a mutational elimination  
420 of feedback control in the corresponding biosynthetic pathway of the bacterial

421 symbionts. Another case is the intracellular pathogen *Nematocida parisii* that secretes  
422 hexokinases to upregulate nucleotide biosynthesis of its host *Caenorhabditis elegans*  
423 (Dean, Hirt et al. 2016). Secretion of these enzymes results in increased levels of  
424 nucleotide biosynthetic precursors in the host cell, which the pathogen in turn utilizes for  
425 growth (Cuomo, Desjardins et al. 2012). Thus, by manipulating the biosynthetic pathway  
426 of their metabolite-producing partner, receiving individuals can ensure a sufficient supply  
427 with the required metabolite. Together, our study and the abovementioned examples  
428 exemplify, for metabolic interactions, how one partner can affect the biosynthesis of  
429 required metabolites of its counterpart by (i) increasing precursor levels (Dean, Hirt et al.  
430 2016), (ii) enhancing the amount of key enzymes (Cuomo, Desjardins et al. 2012), or (iii)  
431 removing end products to delay feed-back inhibition (this study). Given that a metabolic  
432 complementarity on a genetic level is commonly observed in many symbiotic  
433 associations (Zientz, Dandekar et al. 2004) and free-living bacterial communities  
434 (Garcia, Buck et al. 2015), attempts to manipulate metabolite production levels of other  
435 interaction partners in favour of the acting individual are likely prevalent as well. If  
436 production and transport of traded metabolites is limiting the performance of the  
437 obligately interacting consortium as a whole, natural selection should act on optimizing  
438 these features to maximize fitness on a consortium-level.

439 Our work highlights the ease, with which newly emerged auxotrophic bacterial cells  
440 can derive the required nutrients from other cells in their environment. Contact-  
441 dependent exchange mechanisms that are induced upon nutritional stress facilitate the  
442 establishment of metabolic interactions as well as safeguard the transfer of cytoplasmic  
443 materials from one cell to another one (Dubey and Ben-Yehuda , Benomar, Ranava et  
444 al. 2015, Pande, Shitut et al. 2015). The intercellular regulation discovered in this study

445 limits the amount of the traded metabolite that needs to be produced to meet the actual  
446 demand of the receiving cell. This mechanism should help to economize invested  
447 resources on a cell-level, thus allowing optimal growth of the interacting community.

448 Given that a loss of seemingly essential biosynthetic genes is very common in  
449 bacteria (D'Souza, Waschina et al. 2014), it is well conceivable how this type of  
450 reductive genome evolution can result in the formation of multicellular networks of  
451 metabolically interacting bacteria (Pande and Kost 2017). Once a biosynthetic gene is  
452 lost, the resulting auxotrophic genotype is more likely to lose additional genes than to  
453 regain the lost function via horizontal gene transfer (Puigbò, Lobkovsky et al. 2014).  
454 Because dividing metabolic labour in this way can be highly advantageous for the  
455 bacteria involved (Johnson, Goldschmidt et al. 2012, Pande, Merker et al. 2014), in their  
456 natural environment bacteria may exist within networks of multiple bacterial cells that  
457 reciprocally exchange essential metabolites.

458

## 459 **EXPERIMENTAL PROCEDURES**

### 460 **Strains and plasmids used in the study**

461 *Escherichia coli* BW25113 was used as wild type, from which mutants that overproduce  
462 amino acids ( $\Delta mdh$ ,  $\Delta nuoN$ ,  $\Delta hisL$ , and  $\Delta trpR$ ) and mutants that are auxotrophic for  
463 histidine ( $\Delta hisD$ ), lysine ( $\Delta lysR$ ), or tryptophan ( $\Delta trpB$ ) were obtained by a one-step  
464 gene inactivation method (Pande, Merker et al. 2014, Pande, Shitut et al. 2015)  
465 (Supplementary Table 1). Deletion alleles were transferred from existing single gene  
466 deletion mutants (i.e. the Keio collection (Baba, Ara et al. 2006)) into *E. coli* BW25113  
467 using phage P1. The cytoplasm of all donor and recipient strains was labelled by  
468 introducing one of the two plasmids pJBA24-*egfp* and pJBA24-*mCherry*. These plasmids

469 constitutively express the ampicillin resistance gene (*bla*) as well as either the  
470 fluorescent protein EGFP (*egfp*) or mCherry (*mCherry*). Two reporter constructs were  
471 used: (i) lys-riboswitch (pZE21-GFPaav-Lys) for measuring internal amino acid levels  
472 (lysine) and (ii) promoter fusion plasmids (pUAA6-His and pUA66-Trp) for measuring the  
473 transcriptional activity of the promoters *hisL* and *trpL*, respectively (see supplemental  
474 experimental procedures for plasmid construction and characterization of reporter  
475 constructs).

476

### 477 **Culturing methods and general procedures**

478 Minimal media for *Azospirillum brasiliense* (MMAB) (Vanstockem, Michiels et al. 1987)  
479 without biotin and with fructose ( $5 \text{ g l}^{-1}$ ) instead of malate as a carbon source served as  
480 the growth media in all experiments. The required amino acids (histidine, lysine, and  
481 tryptophan) were supplemented individually at a concentration of  $100 \mu\text{M}$ . Cultures were  
482 incubated at a temperature of  $30 \text{ }^\circ\text{C}$  and shaken at 220 rpm for all experiments. All  
483 strains were precultured in replicates by picking single colonies from lysogeny broth (LB)  
484 (Bertani 1951) agar plates and incubated for 18 hours. The next morning, precultures  
485 were diluted to an optical density (OD) of 0.1 at 600 nm as determined by a Tecan  
486 Infinite F200 Pro platereader (Tecan Group Ltd, Switzerland).  $10 \mu\text{l}$  of these precultures  
487 were inoculated into 1 ml of MMAB. In case of cocultures, donor and recipient were  
488 mixed in a 1:1 ratio by co-inoculating  $5 \mu\text{l}$  of each diluted preculture. To cultivate strains  
489 containing the lys-riboswitch, ampicillin was added at a concentration of  $100 \mu\text{g ml}^{-1}$  and  
490 kanamycin was added at  $50 \mu\text{g ml}^{-1}$  in case of strains containing the promoter-GFP-  
491 fusion constructs. Anhydrotetracycline (aTc) (Biomol GmbH, Hamburg, Germany) was  
492 added at a concentration of  $42 \text{ ng ml}^{-1}$  to induce expression of the lys-riboswitch.

493

#### 494 **Contact-dependent exchange of amino acids**

495 To determine if physical contact between cells is required for an exchange of amino  
496 acids between donor and recipient cells, a previously described method was used  
497 (Pande, Shitut et al. 2015). In brief, each donor (i.e. WT,  $\Delta mdh$ ,  $\Delta nuoN$ ,  $\Delta hisL$ , and  
498  $\Delta trpR$ ) was individually paired with each recipient (i.e.  $\Delta hisD$ ,  $\Delta lysR$ , and  $\Delta trpB$ ) and  
499 every combination was inoculated together into a Nurmikko cell that allows cultivation of  
500 both populations either together in the same compartment or separated by a membrane  
501 filter (0.22  $\mu$ m, Pall Corporation, Michigan, USA). The filter allows passage of free amino  
502 acids in the medium, but prevents direct interaction between cells. After inoculating 4 ml  
503 of MMAB, the apparatus was incubated for 24 h. Bacterial growth after 24 h was  
504 determined as colony forming units (CFU) per ml culture volume by plating the serially-  
505 diluted culture on MMAB agar plates that did or did not contain ampicillin or kanamycin  
506 for selection. The increase in cell number was calculated as the logarithm of the  
507 difference between the CFU counts determined at the onset (0 h) of the experiment and  
508 after 24 h. Each donor-recipient combination was replicated 4-times for both  
509 experimental conditions (i.e. with and without filter).

510

#### 511 **Relative fitness measurement**

512 To quantify the effect of amino acid production on the fitness of donors, the growth of  
513 donor genotypes in terms of CFU per ml was calculated for mono- and coculture  
514 conditions at 4 time points in the exponential phase of growth (i.e. 14 h, 16 h, 18 h, and  
515 20 h). Each donor (i.e. WT,  $\Delta mdh$ ,  $\Delta nuoN$ ,  $\Delta hisL$ , and  $\Delta trpR$ ) was individually paired  
516 with one of each recipient (i.e.  $\Delta hisD$ ,  $\Delta lysR$ , and  $\Delta trpB$ ) as well as grown in

517 monoculture. Every combination was replicated six times. A regression line was fitted to  
518 the individual data points of a given condition (mono- or coculture) and the slope of this  
519 line was calculated to obtain the growth rate. The relative fitness of different donors was  
520 determined by dividing the growth rate each genotype achieved in coculture by the value  
521 of its respective monoculture.

522

### 523 **Scanning electron microscopy**

524 Donor and recipient genotypes were either mono- or cocultured in 1 ml of liquid MMAB  
525 with and without amino acid supplementation for 24 h. 1 ml of culture was then fixed  
526 using a 2.5% glutaraldehyde solution prepared in a sodium cacodylate buffer (0.1 M, pH  
527 7.0) for 1 h at room temperature. All fixed samples were allowed to sediment onto poly-  
528 L-lysine-coated glass coverslips (Sigma-Aldrich) for an additional 1 h time period. The  
529 glass coverslips were sputter-coated with a gold layer (25 nm) in a BAL-TEC SCD005  
530 Sputter Coater (BAL-TEC, Lichtenstein). The gold-coated samples were visualized using  
531 a LEO 1530 Gemini field emission scanning electron microscope (Carl Zeiss, Jena) at 5  
532 kV acceleration voltage and a working distance of 5 mm using an in-lens secondary  
533 electron detector.

534

### 535 **Flow cytometric analysis of cytoplasmic protein transfer**

536 A previously established protocol was applied to identify a transfer of cytoplasmic  
537 material from donor to recipient genotypes (Pande, Shitut et al. 2015). For this, pairs of  
538 donor and recipient cells with differentially labeled cytoplasm (i.e. containing EGFP or  
539 mCherry) were co-inoculated into 1 ml MMAB. At the beginning of the experiment (0 h)  
540 and after 24 h of growth, the sample was analyzed in a Partec CyFlow Space flow

541 cytometer (Partec, Germany). In the flow cytometer, cells were excited at 488 nm with a  
542 blue solid-state laser (20 mV) and at 561 nm with a yellow solid-state laser (100 mV).  
543 Green (*egfp*) and red (*mCherry*) fluorescence emission was detected at 536 nm and 610  
544 nm, respectively. *E. coli* WT devoid of any plasmid was used as a non-fluorescent  
545 control. The number of single- and double-labeled cells in a population was quantified at  
546 both time points. Data analysis and acquisition was done using the FlowMax software  
547 (Partec GmbH, Germany). The experiment was conducted by coculturing eGFP-labelled  
548 donor with mCherry-labelled recipient genotypes and *vice versa* in all possible  
549 combinations (i.e. each donor paired with each recipient, except in case of  $\Delta hisL$  and  
550  $\Delta trpR$ , which were only paired with  $\Delta hisD$  and  $\Delta trpB$ , respectively) for 24 h. Each  
551 combination was replicated 4-times.

552

### 553 **Fluorescence measurement**

554 The fluorescence levels of cells containing the lys-riboswitch or the promoter-GFP-fusion  
555 constructs were measured by transferring 200  $\mu$ l of the culture into a black 96-microwell  
556 plate (Nunc, Denmark) and inserting the plate into a Tecan Infinite F200 Pro platereader  
557 (Tecan Group Ltd, Switzerland). The plate was shaken for 5 seconds prior to excitation  
558 at 488 nm followed by emission detection at 536 nm. Fluorescence values were always  
559 recorded together with a cognate control measurement. In case of the lys-riboswitch, the  
560 uninduced plasmid-containing culture served this purpose, while in case of the promoter  
561 fusion constructs, the promoter-less plasmid (pUA66) was used as control.

562

### 563 **Statistical analysis**

564 Normal distribution of data was assessed using the Kolmogorov-Smirnov test and data  
565 was considered to be normally distributed when  $P > 0.05$ . Homogeneity of variances  
566 was determined using the Levene's test and variances were considered homogenous if  
567  $P > 0.05$ . One-way ANOVA followed by a Dunnett's T3 post hoc test was used to  
568 compare growth differences in the contact-dependent growth analysis. Differences in the  
569 fluorescence emission levels of donor cells in the presence and absence of a recipient  
570 were assessed with paired sample t-tests. The same test was used to compare the  
571 number of recipient ( $\Delta lysR$ ) CFUs at the start and at the end of the coculture  
572 experiments to detect donor-enabled growth. The False Discovery Rate (FDR)  
573 procedure of Benjamini *et al.* (2006) was applied to correct P values after multiple  
574 testing. Pearson product moment correlation provided identification of the statistical  
575 relationship between cytoplasmic amino acid levels and fluorescence emission as well  
576 as between cytoplasmic lysine level and growth of the  $\Delta lysR$  recipient.

577

## 578 **ACKNOWLEDGEMENTS**

579 The authors thank Michael Reichelt for help with LC/MS/MS measurements, Uri Alon for  
580 providing the pZE21-GFP<sub>aaV</sub> plasmid, Olin Silander for providing the promoter-GFP-  
581 fusion plasmids, Uwe Sauer for the promoter-less plasmid, Helge Weingart for supplying  
582 the pJBA24-*egfp* plasmid, and Wilhelm Boland for support. This manuscript benefitted  
583 greatly from discussions with the EEE-group, Martin Kaltenpoth and his Symbiosis-  
584 group, as well as Erika Kothe. This work was funded by grants from the Volkswagen  
585 Foundation, the Jena School for Microbial Communication as well as the DFG (SFB  
586 944/2-2016).



587 **REFERENCES**

- 588 Akashi, H., & Gojobori, T. (2002). Metabolic efficiency and amino acid composition in the  
589 proteomes of *Escherichia coli* and *Bacillus subtilis*. *Proc Natl Acad Sci U S A*,  
590 **99**(6), 3695-3700.
- 591 Ames, B. N., Tsang, T. H., Buck, M., & Christman, M. F. (1983). The leader mRNA of  
592 the histidine attenuator region resembles tRNA<sup>His</sup>: possible general regulatory  
593 implications. *Proc Natl Acad Sci U S A*, **80**(17), 5240-5242.
- 594 Baba T, Ara T, Hasegawa M, Takai Y, Okumura Y, Baba M *et al* (2006). Construction of  
595 *Escherichia coli* K-12 in-frame, single-gene knockout mutants: the Keio collection.  
596 *Mol Sys Biol* **2**: 2006.0008-2006.0008.
- 597 Belenguer A, Duncan SH, Calder AG, Holtrop G, Louis P, Lobley GE *et al* (2006). Two  
598 routes of metabolic cross-feeding between *Bifidobacterium adolescentis* and  
599 butyrate-producing anaerobes from the human gut. *Appl Environ Microbiol* **72**:  
600 3593-3599.
- 601 Beloin C, Valle J, Latour-Lambert P, Faure P, Kzreminski M, Balestrino D *et al* (2004).  
602 Global impact of mature biofilm lifestyle on *Escherichia coli* K-12 gene  
603 expression. *Mol Microbiol* **51**: 659-674.
- 604 Belting, M., & Wittrup, A. (2008). Nanotubes, exosomes, and nucleic acid-binding  
605 peptides provide novel mechanisms of intercellular communication in eukaryotic  
606 cells: implications in health and disease. *J Cell Biol*, **183**(7), 1187-1191.
- 607 Benomar, S., Ranava, D., Cárdenas, M. L., Trably, E., Rafrafi, Y., Ducret, A., . . .  
608 Giudici-Orticoni, M.-T. (2015). Nutritional stress induces exchange of cell material  
609 and energetic coupling between bacterial species. *Nat Commun*, **6**: 6283.
- 610 Bertani G (1951). Studies on lysogenesis I.: The mode of phage liberation by lysogenic  
611 *Escherichia coli*. *J Bacteriol* **62**: 293-300.
- 612 Bertels F, Merker H, Kost C (2012). Design and characterization of auxotrophy-based  
613 amino acid biosensors. *PLoS One* **7**: e41349.
- 614 Blasi F, Bruni CB, Avitabile A, Deeley RG, Goldberger RF, Meyers MM (1973). Inhibition  
615 of transcription of the histidine operon *in vitro* by the first enzyme of the histidine  
616 pathway. *Proc Natl Acad Sci U S A* **70**: 2692-2696.
- 617 Carlson RP (2007). Metabolic systems cost-benefit analysis for interpreting network  
618 structure and regulation. *Bioinformatics* **23**: 1258-1264.
- 619 Caron MP, Bastet L, Lussier A, Simoneau-Roy M, Masse E, Lafontaine DA (2012). Dual-  
620 acting riboswitch control of translation initiation and mRNA decay. *Proc Natl Acad*  
621 *Sci U S A* **109**: E3444-E3453.
- 622 Chechik G, Oh E, Rando O, Weissman J, Regev A, Koller D (2008). Activity motifs  
623 reveal principles of timing in transcriptional control of the yeast metabolic network.  
624 *Nat Biotechnol* **26**: 1251.
- 625 Chopin A (1993). Organization and regulation of genes for amino acid biosynthesis in  
626 lactic acid bacteria. *FEMS Microbiol rev* **12**: 21-37.
- 627 Craig CL, Weber RS (1998). Selection costs of amino acid substitutions in ColE1 and  
628 Colla gene clusters harbored by *Escherichia coli*. *Mol Biol Evol* **15**: 774-776.
- 629 Croft MT, Lawrence AD, Raux-Deery E, Warren MJ, Smith AG (2005). Algae acquire  
630 vitamin B12 through a symbiotic relationship with bacteria. *Nature* **438**: 90.
- 631 Csonka LN (1989). Physiological and genetic responses of bacteria to osmotic stress.  
632 *Microbiol Rev* **53**: 121-147.

- 633 Cuomo CA, Desjardins CA, Bakowski MA, Goldberg J, Ma AT, Becnel JJ *et al* (2012).  
634 Microsporidian genome analysis reveals evolutionary strategies for obligate  
635 intracellular growth. *Genome Res* **22**: 2478-2488.
- 636 D'Souza G, Waschina S, Pande S, Bohl K, Kaleta C, Kost C (2014). Less is more:  
637 selective advantages can explain the prevalent loss of biosynthetic genes in  
638 bacteria. *Evolution* **68**: 2559-2570.
- 639 D'Souza G, Kost C (2016). Experimental evolution of metabolic dependency in bacteria.  
640 *PLoS Genet* **12**: e1006364.
- 641 Dean P, Hirt RP, Embley TM (2016). Microsporidia: why make nucleotides if you can  
642 steal them? *PLoS Path* **12**: e1005870.
- 643 Dubey GP, Ben-Yehuda S Intercellular nanotubes mediate bacterial communication.  
644 *Cell* **144**: 590-600.
- 645 Estrela S, Kerr B, Morris JJ (2016). Transitions in individuality through symbiosis. *Curr*  
646 *Opin Microbiol* **31**: 191-198.
- 647 Garcia SL, Buck M, McMahon KD, Grossart H-P, Eiler A, Warnecke F (2015).  
648 Auxotrophy and intrapopulation complementary in the 'interactome' of a cultivated  
649 freshwater model community. *Mol Ecol* **24**: 4449-4459.
- 650 Giovannoni SJ, Tripp HJ, Givan S, Podar M, Vergin KL, Baptista D *et al* (2005). Genome  
651 streamlining in a cosmopolitan oceanic bacterium. *Science* **309**: 1242-1245.
- 652 Grüning N-M, Lehrach H, Ralser M (2010). Regulatory crosstalk of the metabolic  
653 network. *TIBS* **35**: 220-227.
- 654 Holms H (1996). Flux analysis and control of the central metabolic pathways in  
655 *Escherichia coli*. *Fems Microbiol Rev* **19**: 85-116.
- 656 Hubalek V, Buck M, Tan B, Foght J, Wendeberg A, Berry D *et al* (2017). Vitamin and  
657 amino acid auxotrophy in anaerobic consortia operating under methanogenic  
658 conditions. *mSystems* **2**: e00038-17.
- 659 Jahn U, Gallenberger M, Paper W, Junglas B, Eisenreich W, Stetter KO *et al* (2008).  
660 *Nanoarchaeum equitans* and *Ignicoccus hospitalis*: new insights into a unique,  
661 intimate association of two Archaea. *J Bacteriol* **190**: 1743-1750.
- 662 Johnson DR, Goldschmidt F, Lilja EE, Ackermann M (2012). Metabolic specialization  
663 and the assembly of microbial communities. *ISME J* **6**: 1985-1991.
- 664 Junglas B, Briegel A, Burghardt T, Walther P, Wirth R, Huber H *et al* (2008). *Ignicoccus*  
665 *hospitalis* and *Nanoarchaeum equitans*: ultrastructure, cell–cell interaction, and  
666 3D reconstruction from serial sections of freeze-substituted cells and by electron  
667 cryotomography. *Arch Microbiol* **190**: 395-408.
- 668 Kaleta C, Schäuble S, Rinas U, Schuster S (2013). Metabolic costs of amino acid and  
669 protein production in *Escherichia coli*. *Biotechnol J* **8**: 1105-1114.
- 670 Kiers ET, Rousseau RA, West SA, Denison RF (2003). Host sanctions and the legume–  
671 rhizobium mutualism. *Nature* **425**: 78.
- 672 Kun Á, Papp B, Szathmáry E (2008). Computational identification of obligatorily  
673 autocatalytic replicators embedded in metabolic networks. *Genome Biol* **9**: R51-  
674 R51.
- 675 Lee SJ, Trostel A, Le P, Harinarayanan R, FitzGerald PC, Adhya S (2009). Cellular  
676 stress created by intermediary metabolite imbalances. *Proc Natl Acad Sci U S A*  
677 **106**: 19515-19520.
- 678 Loera-Muro A, Jacques M, Avelar-González FJ, Labrie J, Tremblay YDN, Oropeza-  
679 Navarro R *et al* (2016). Auxotrophic *Actinobacillus pleurpneumoniae* grows in

- 680 multispecies biofilms without the need for nicotinamide-adenine dinucleotide  
681 (NAD) supplementation. *BMC Microbiol* **16**: 128.
- 682 McFall-Ngai MJ (2014). The importance of microbes in animal development: lessons  
683 from the Squid-Vibrio symbiosis. *Ann Rev Microbiol* **68**: 177-194.
- 684 Merino E, Jensen RA, Yanofsky C (2008). Evolution of bacterial trp operons and their  
685 regulation. *Curr Opin Microbiol* **11**: 78-86.
- 686 Morris JJ, Lenski RE, Zinser ER (2012). The Black Queen Hypothesis: evolution of  
687 dependencies through adaptive gene loss. *MBio* **3**: e00036-00012.
- 688 Morris JJ (2015). Black Queen evolution: the role of leakiness in structuring microbial  
689 communities. *Trends Genetics* **31**: 475-482.
- 690 Paczia N, Nilgen A, Lehmann T, Gätgens J, Wiechert W, Noack S (2012). Extensive  
691 exometabolome analysis reveals extended overflow metabolism in various  
692 microorganisms. *Microb Cell Factories* **11**: 122.
- 693 Pande S, Merker H, Bohl K, Reichelt M, Schuster S, de Figueiredo LF *et al* (2014).  
694 Fitness and stability of obligate cross-feeding interactions that emerge upon gene  
695 loss in bacteria. *ISME J* **8**: 953-962.
- 696 Pande S, Kaftan F, Lang S, Svatos A, Germerodt S, Kost C (2015a). Privatization of  
697 cooperative benefits stabilizes mutualistic cross-feeding interactions in spatially  
698 structured environments. *ISME J* **10**: 1413–1423.
- 699 Pande S, Shitut S, Freund L, Westermann M, Bertels F, Colesie C *et al* (2015b).  
700 Metabolic cross-feeding via intercellular nanotubes among bacteria. *Nat Commun*  
701 **6**: 6238.
- 702 Pande S, Kost C (2017). Bacterial unculturability and the formation of intercellular  
703 metabolic networks. *Trends Microbiol* **25**: 349-361.
- 704 Payne TMB, Rouatt JW, Lochhead AG (1957). The relationship between soil bacteria  
705 with simple nutritional requirements and those requiring amino acids. *Can J*  
706 *Microbiol* **3**: 73-80.
- 707 Ponomarova O, Patil KR (2015). Metabolic interactions in microbial communities:  
708 untangling the Gordian knot. *Curr Opin Microbiol* **27**: 37-44.
- 709 Puigbò P, Lobkovsky AE, Kristensen DM, Wolf YI, Koonin EV (2014). Genomes in  
710 turmoil: quantification of genome dynamics in prokaryote supergenomes. *BMC*  
711 *Biology* **12**: 1-19.
- 712 Rodionova IA, Li X, Plymale AE, Motamedchaboki K, Konopka AE, Romine MF *et al*  
713 (2015). Genomic distribution of B-vitamin auxotrophy and uptake transporters in  
714 environmental bacteria from the Chloroflexi phylum. *Environ Microbiol Rep* **7**:  
715 204-210.
- 716 Russell CW, Poliakov A, Haribal M, Jander G, van Wijk KJ, Douglas AE (2014).  
717 Matching the supply of bacterial nutrients to the nutritional demand of the animal  
718 host. *Proc R Soc Lond B Biol Sci* **281**: 7.
- 719 Sahu B, Ray MK (2008). Auxotrophy in natural isolate: minimal requirements for growth  
720 of the Antarctic psychrotrophic bacterium *Pseudomonas syringae* Lz4W. *J Basic*  
721 *Microbiol* **48**: 38-47.
- 722 Scott M, Gunderson CW, Mateescu EM, Zhang Z, Hwa T (2010). Interdependence of  
723 cell growth and gene expression: origins and consequences. *Science* **330**: 1099-  
724 1102.
- 725 Seth EC, Taga ME (2014). Nutrient cross-feeding in the microbial world. *Front Microbiol*  
726 **5**: 350.

- 727 Shiiro I, Ocirc, Tsuka S-I, Ocirc, Takahashi M (1962). Effect of biotin on the bacterial  
728 formation of glutamic acid I. Glutamate formation and cellular permeability of  
729 amino acids. *J Biochem* **51**: 56-62.
- 730 Sieuwerts S, Molenaar D, van Hijum SAFT, Beerthuyzen M, Stevens MJA, Janssen  
731 PWM *et al* (2010). Mixed-Culture transcriptome analysis reveals the molecular  
732 basis of mixed-culture growth in *Streptococcus thermophilus* and *Lactobacillus*  
733 *bulgaricus*. *Appl Environ Microbiol* **76**: 7775-7784.
- 734 Thieffry D, Huerta AM, Perez-Rueda E, Collado-Vides J (1998). From specific gene  
735 regulation to genomic networks: a global analysis of transcriptional regulation in  
736 *Escherichia coli*. *Bioessays* **20**: 433-440.
- 737 Umbarger HE (1978). Amino acid biosynthesis and its regulation. *Ann Rev Biochem* **47**:  
738 533-606.
- 739 Vanstockem M, Michiels K, Vanderleyden J, Van Gool AP (1987). Transposon  
740 mutagenesis of *Azospirillum brasilense* and *Azospirillum lipoferum*: physical  
741 analysis of Tn5 and Tn5-Mob insertion mutants. *Appl Environ Microbiol* **53**: 410-  
742 415.
- 743 Vogel KJ, Moran NA (2011). Sources of variation in dietary requirements in an obligate  
744 nutritional symbiosis. *Proc R Soc Lond B Biol Sci* **278**: 115-121.
- 745 Wegener J (2001). Cell Junctions. eLS. John Wiley & Sons, Ltd.
- 746 Yanofsky C, Platt T, Crawford IP, Nichols BP, Christie GE, Horowitz H *et al* (1981). The  
747 complete nucleotide sequence of the tryptophan operon of *Escherichia coli*.  
748 *Nucleic Acids Res* **9**: 6647-6668.
- 749 Yanofsky C (2004). The different roles of tryptophan transfer RNA in regulating trp  
750 operon expression in *E. coli* versus *B. subtilis*. *Trends Genet* **20**: 367-374.
- 751 Zaslaver A, Bren A, Ronen M, Itzkovitz S, Kikoin I, Shavit S *et al* (2006). A  
752 comprehensive library of fluorescent transcriptional reporters for *Escherichia coli*.  
753 *Nat Meth* **3**: 623-628.
- 754 Zelezniak A, Andrejev S, Ponomarova O, Mende DR, Bork P, Patil KR (2015). Metabolic  
755 dependencies drive species co-occurrence in diverse microbial communities.  
756 *Proc Natl Acad Sci U S A* **112**: 6449-6454.
- 757 Zientz E, Dandekar T, Gross R (2004). Metabolic interdependence of obligate  
758 intracellular bacteria and their insect hosts. *Microbiol Mol Biol Rev* **68**: 745-770.

759  
760

## 761 **AUTHOR CONTRIBUTIONS**

762 CK and SS conceived the study, SS, CK, and SP designed the study. SS performed all  
763 experiments. SS and CK interpreted and analyzed the data. TA generated some  
764 plasmids for the study. SS and CK wrote the manuscript, all authors amended the  
765 manuscript.

766

767 **FIGURES**

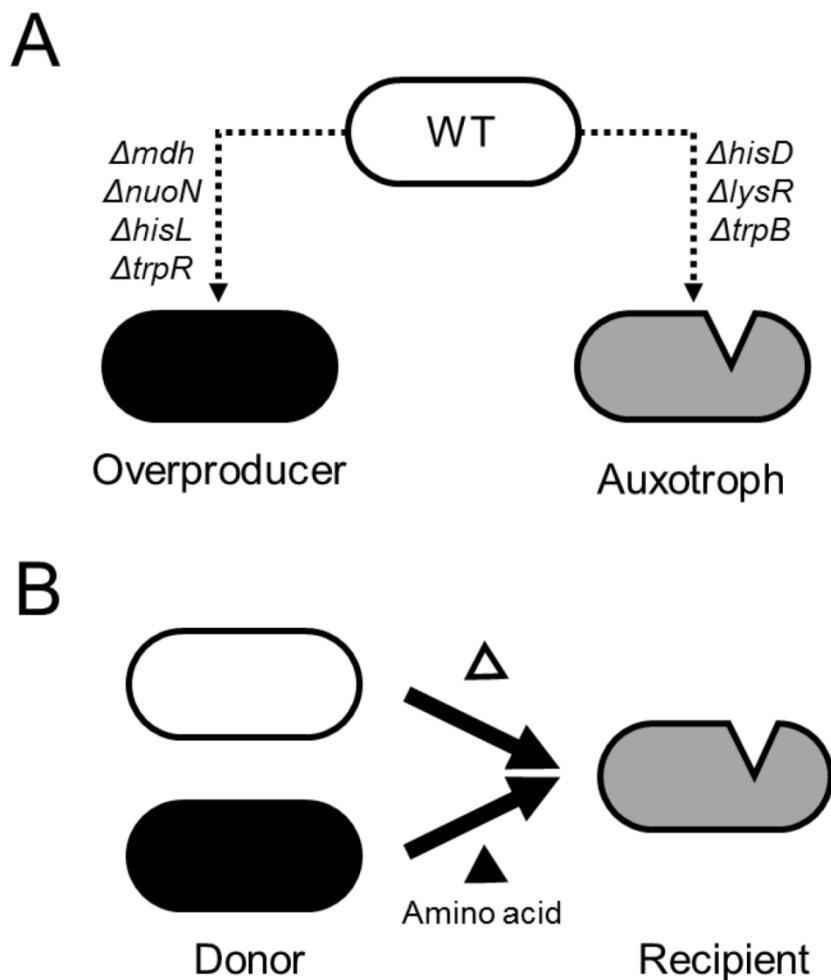

768

769 **Figure 1. Experimental system used.** (A) Design of genotypes. Single genes were  
770 deleted from *E. coli* BW25113 wild type (WT) to generate mutants that produce  
771 increased amounts of amino acids (overproducer) as well as mutants that essentially  
772 require a certain amino acid to grow (auxotroph). (B) Coculturing an amino acid donor  
773 (i.e. WT or overproducer) together with an auxotrophic recipient results in a one-way  
774 cross-feeding interaction that is obligate for the recipient, but not the donor.

775

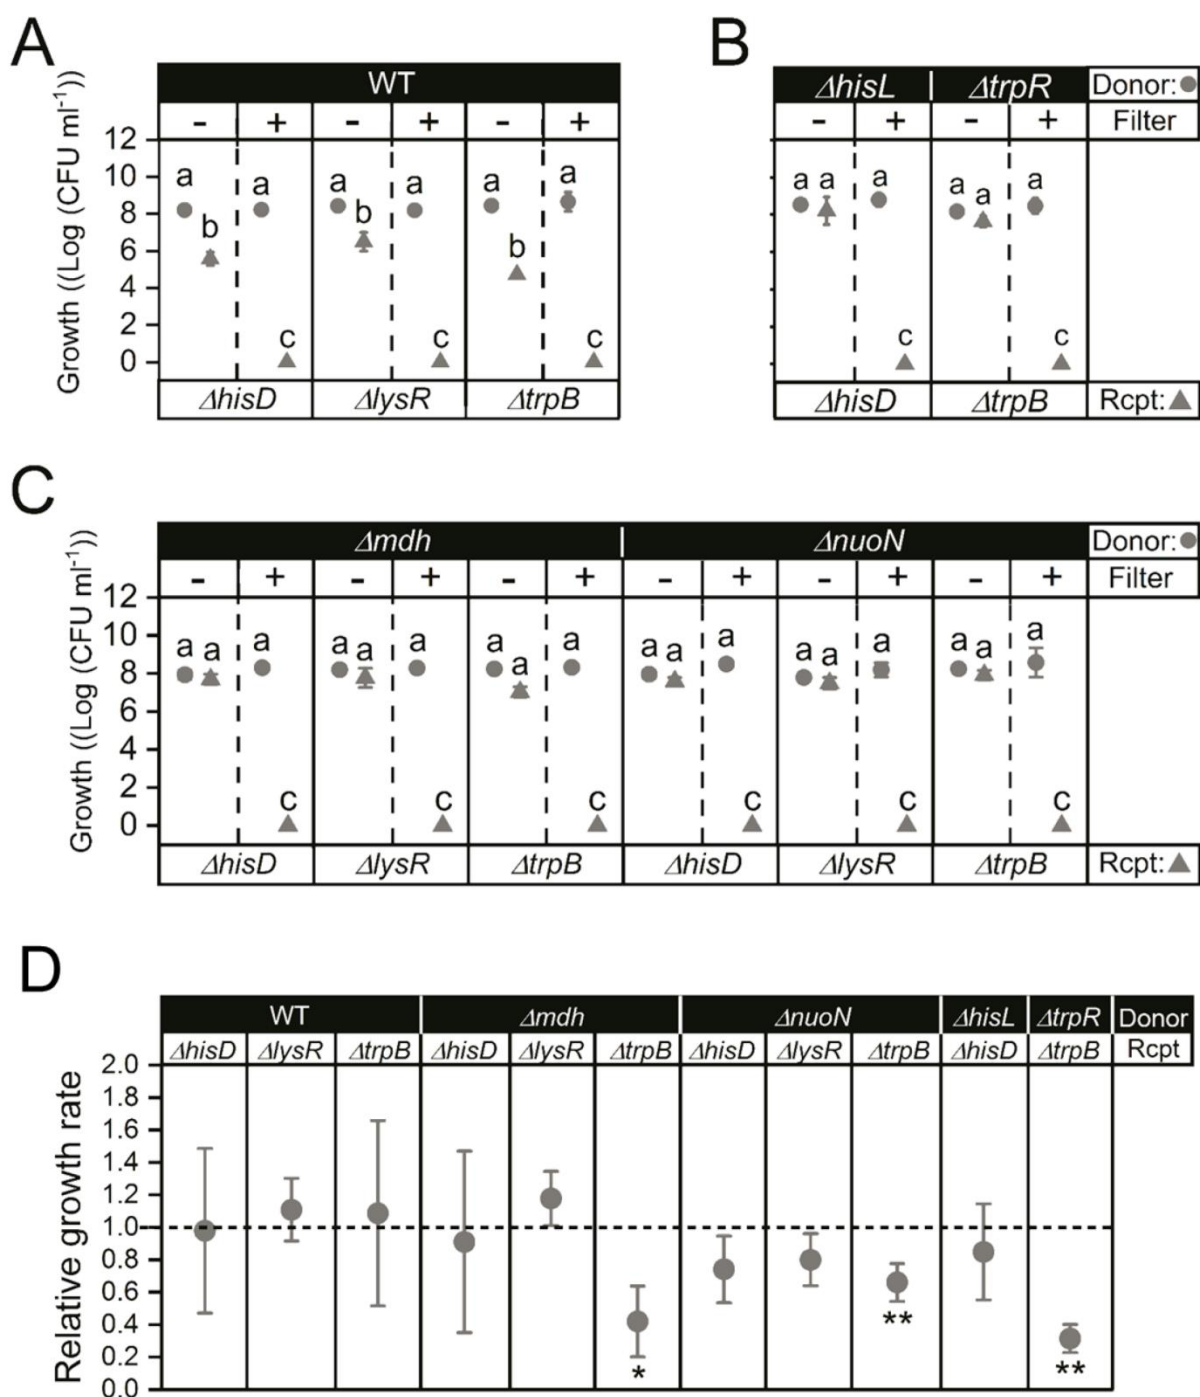

776

777 **Figure 2. Contact-dependent exchange of cytoplasmic amino acids. (A-C)** Amino  
 778 acid exchange is contact-dependent. Amino acid donors (circles) were cocultured with  
 779 auxotrophic recipients (Rcpt, triangles);  $\Delta hisD$ ,  $\Delta lysR$ ,  $\Delta trpB$ . Strains were cultured  
 780 either together in the same compartment (- Filter) or separated by a filter membrane (+  
 781 Filter) that allows passage of free amino acids, but prevents direct physical contact  
 782 between cells. Growth over 24 h was determined as number of colony-forming units  
 783 (CFU) per ml by subtracting the value at 0 h from that reached at 24 h. Different letters

784 indicate significant differences (Dunnett's T3 post hoc test:  $P < 0.05$ ,  $n=4$ ). (D) Cost of  
 785 amino acid overproduction. The growth rate of the donors (WT and overproducers) when  
 786 grown in coculture with auxotrophic recipients is plotted relative to that in monocultures  
 787 (dashed line). Growth rate was calculated as slope of the growth curve over the  
 788 exponential phase (14 h to 20 h after inoculation). Asterisks indicate significant  
 789 differences of growth rates between mono- and cocultures (paired t-test: \*\*  $P < 0.01$ , \*  
 790  $P < 0.05$ ,  $n=4$ ). In all cases, mean ( $\pm 95\%$  confidence interval) are shown.  
 791

A

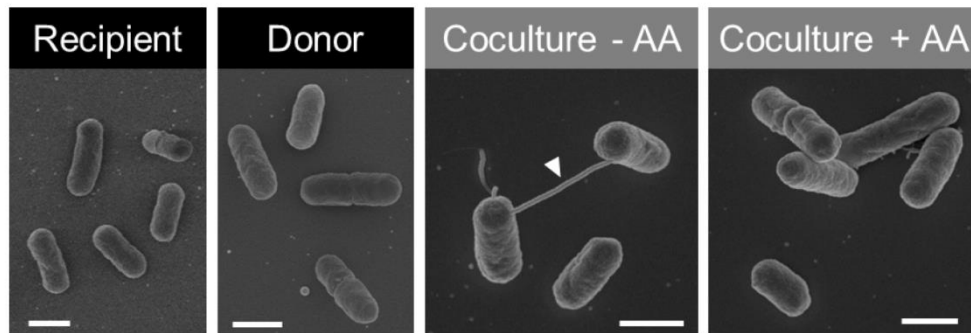

B

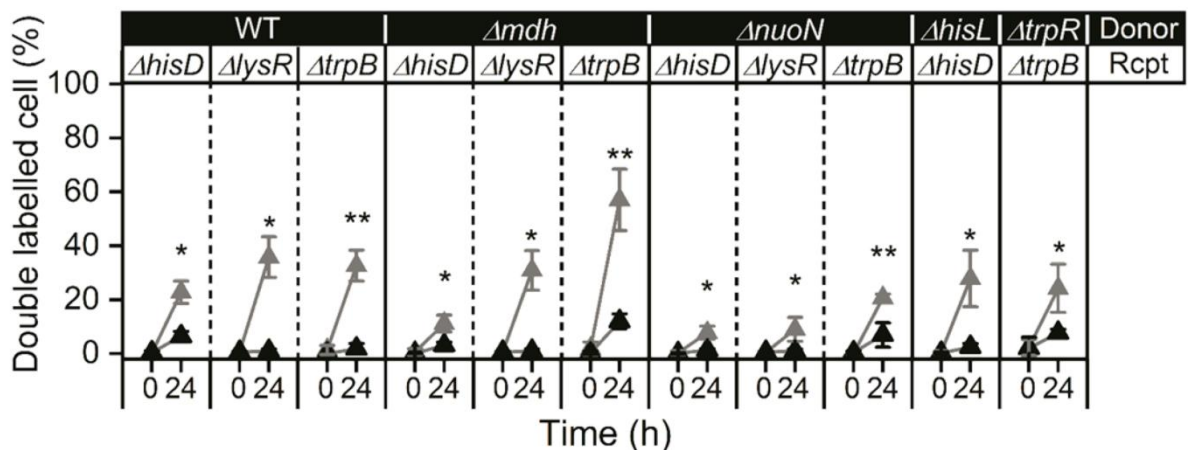

792  
 793 **Figure 3. Exchange of cytoplasmic content through nanotubes.** (A) Scanning EM  
 794 images of recipient ( $\Delta hisD$ ) and donor ( $\Delta hisL$ ) in monoculture (black) and donor-  
 795 recipient coculture (grey) conditions in the absence (- AA) and presence (+ AA) of amino  
 796 acids after 24 hours of growth. Nanotubes (white pointer) were only observed in  
 797 coculture without amino acid supplementation (Coculture - AA). Scale bars = 1  $\mu\text{m}$ . (B)  
 798 Cells exchange cytoplasmic material. The cytoplasm of donors and recipients were  
 799 differentially labelled with the fluorescent proteins EGFP and mCherry, respectively.  
 800 Quantifying the proportion of double-labelled auxotrophs containing both cytoplasmic

801 markers after 0 h and 24 h of coculture allowed assessing an exchange of cytoplasm  
802 between bacterial cells. The experiment was conducted in the absence (grey triangles)  
803 and presence (black triangles) of the focal amino acid (100  $\mu$ M). Asterisks indicate  
804 significant differences (paired t-test: \*\*  $P < 0.01$ , \*  $P < 0.05$ ,  $n=4$ ). In all cases, mean  
805 ( $\pm 95\%$  confidence interval) are shown.

806

807

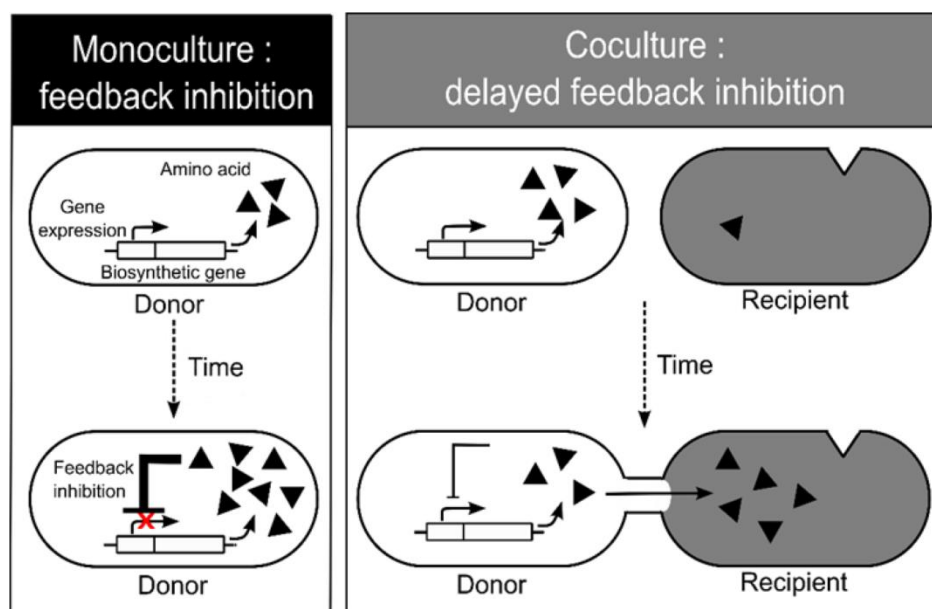

808

809 **Figure 4. Delayed feedback inhibition hypothesis.** In monoculture (left panel, black),  
810 amino acid concentrations in the cytoplasm of donor cells build up over time. When a  
811 certain concentration threshold is reached, these metabolites inhibit their own production  
812 by suppressing the expression of the corresponding amino acid biosynthesis genes (i.e.  
813 end product-mediated feedback inhibition). In coculture (right panel, grey), auxotrophic  
814 recipients reduce cytoplasmic amino acid concentrations of donor cells. As a  
815 consequence, feedback inhibition of biosynthesis genes is delayed, thus resulting in an  
816 increased amino acid biosynthesis.

817



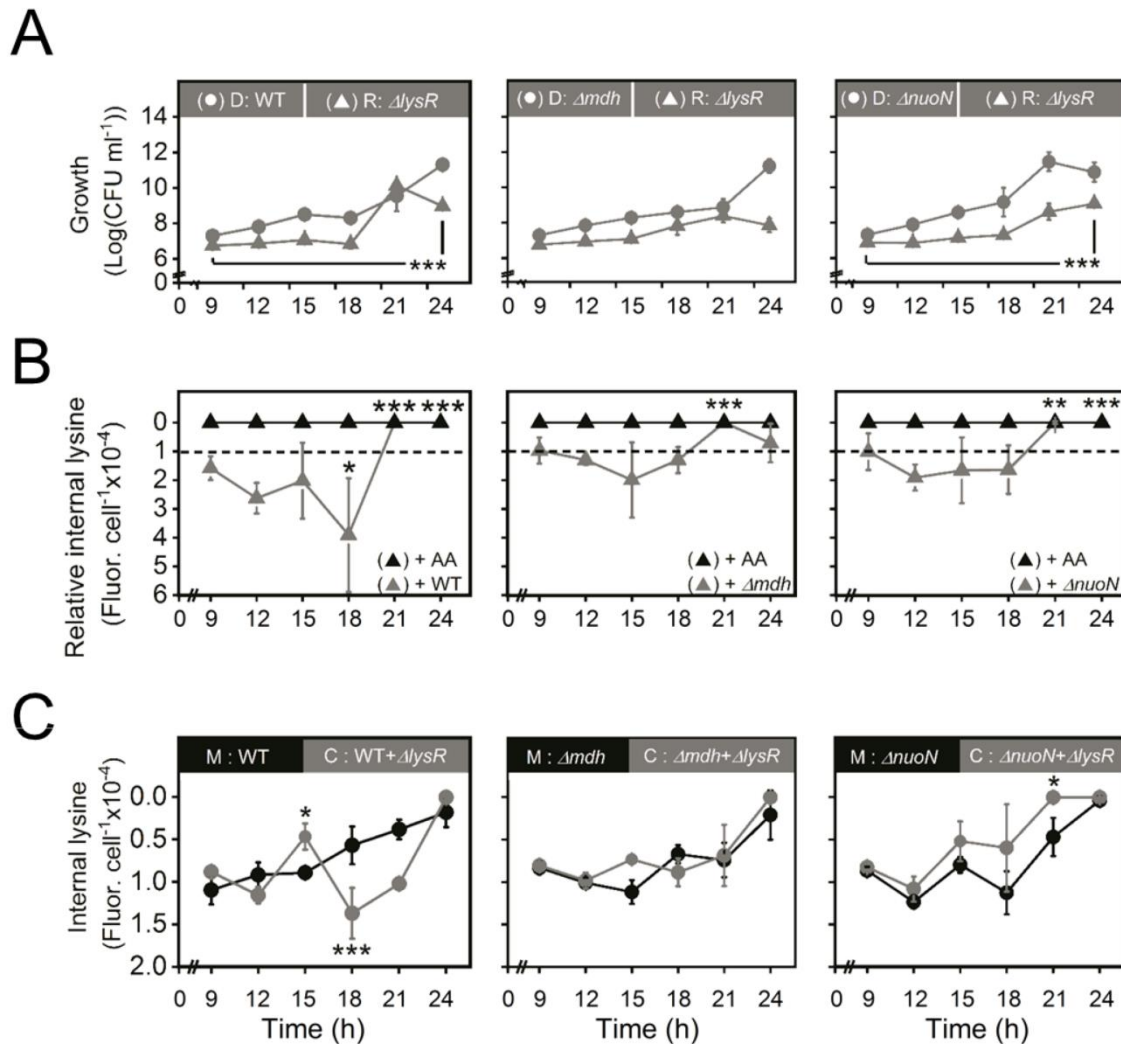

818

819 **Figure 5. The presence of auxotrophs increases cytoplasmic amino acid levels in**  
 820 **donor cells. (A)** Growth of each partner in cocultures of donor (D, circles) and recipient  
 821 (R, triangles) populations was determined as the number of colony-forming units (CFUs)  
 822 ml<sup>-1</sup> over 24 h. **(B, C)** Cytoplasmic lysine levels were quantified by measuring GFP  
 823 fluorescence emission from a cell-internal reporter and normalized per cell containing  
 824 the reporter. Low fluorescence levels indicate high lysine levels (note the inverted y-  
 825 axes). **(B)** Lysine levels in lysine-supplemented monocultures (+ AA) and un-  
 826 supplemented cocultures were measured relative to lysine-starved monocultures  
 827 (dashed line). In the presence of lysine, monocultures of the recipient (black triangles)  
 828 showed constantly increased cytoplasmic lysine levels. In coculture with the donor (grey  
 829 triangles), lysine levels in the recipient first declined and then increased back to the level  
 830 of the +AA condition. **(C)** In coculture with lysine-auxotrophic recipients, cytoplasmic  
 831 lysine levels of WT donor cells were significantly increased at 15 h of growth and  
 832 significantly decreased at 18 h of growth in coculture (C, grey circles) relative to  
 833 monoculture conditions (M, black circles). However, in case of the overproducers  $\Delta$ mdh

834 and  $\Delta nuoN$ , cell-internal lysine levels did not vary between mono- and coculture  
 835 conditions. In all cases, mean ( $\pm 95\%$  confidence interval) are shown and asterisks  
 836 indicate the results of FDR-corrected paired sample t-tests (\* $P < 0.05$ , \*\*\* $P < 0.001$ ,  $n = 4$ ).  
 837

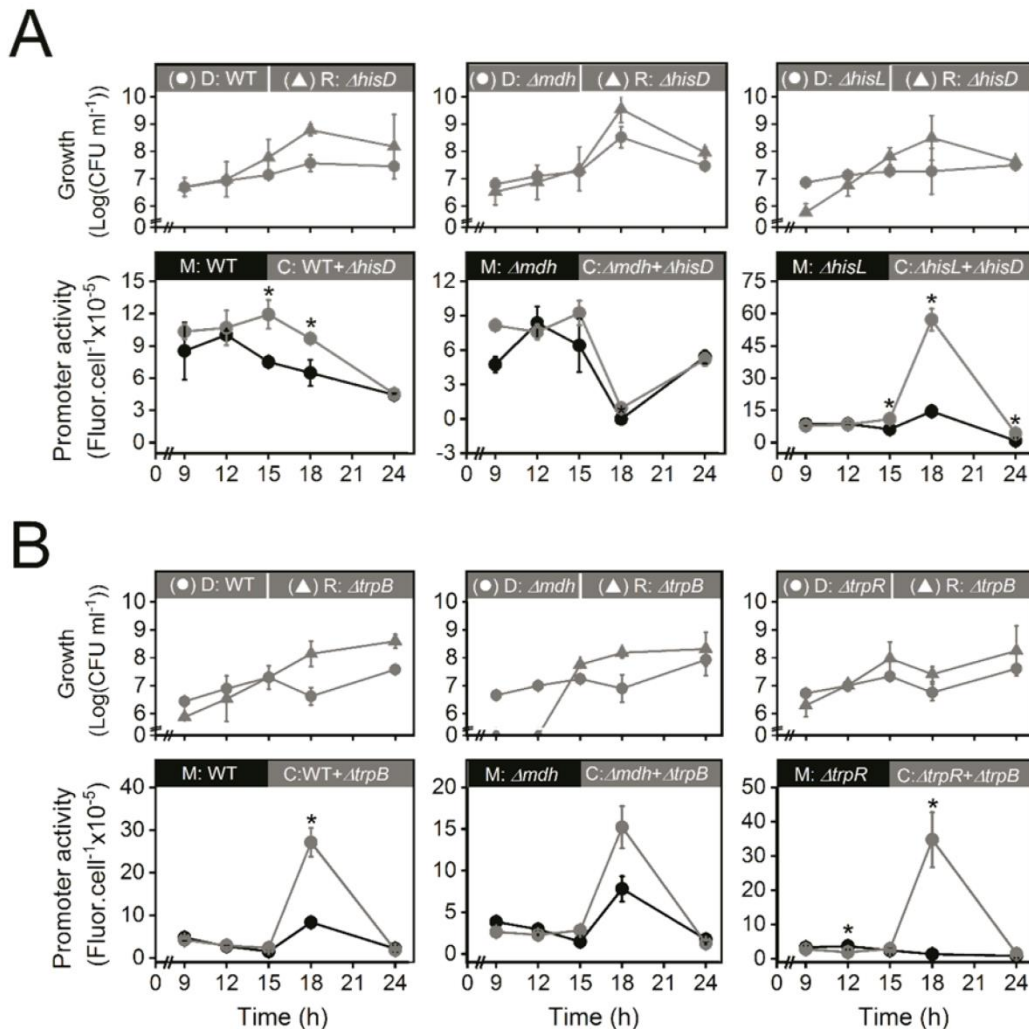

838

839 **Figure 6. The presence of auxotrophs increases transcription of biosynthetic**  
 840 **genes in the donor. (A, B) Top panels show growth of donor (D, circle) and recipient**  
 841 **(R, triangle) in coculture over time quantified as the number of colony-forming units**  
 842 **(CFU) per ml. Bottom panels show promoter activity of the donors' amino acid**  
 843 **biosynthesis gene in monoculture (M, black circles) and coculture with an auxotrophic**  
 844 **recipient (C, grey circles). Promoter activity was quantified as the emission of GFP**  
 845 **fluorescence from a promoter-GFP-fusion construct and normalized per number of**  
 846 **donor cells (CFUs) containing the construct. Asterisks indicate significant differences of**  
 847 **the promoter activity of donor cells in mono- and coculture conditions (FDR-corrected**  
 848 **paired t-test: \*  $P < 0.05$ ,  $n = 4$ ). Populations of donor cells (D, circles) were grown in**  
 849 **monoculture or cultivated together with (A) the histidine auxotrophic recipient ( $\Delta hisD$ ) or**

850 **(B)** the tryptophan auxotrophic recipient ( $\Delta trpB$ ). In all cases, mean ( $\pm 95\%$  confidence  
851 interval) are shown.

852

853

854
